# Supplementary material for: K2TeP2O8: a new telluro-phosphate with a pentagonal Te–P–O layer structure
Source: Royal Society of Chemistry journal article supplement (doi:10.1039/c8dt01576g), 2018-01-01
Supplement: c8dt01576g2.pdf [file c8dt01576g2.pdf]

**Supporting Information**

**K<sub>2</sub>TeP<sub>2</sub>O<sub>8</sub>: A new telluro-phosphate with a pentagonal Te–P–O layer  
structure**

Ming Wen,<sup>a</sup> Cong Hu,<sup>b</sup> Zhihua Yang,<sup>b</sup> Xiaohong Wu,<sup>\*a</sup> and Shilie Pan<sup>\*ab</sup>

*<sup>a</sup> School of Chemistry and Chemical Engineering, Harbin Institute of Technology,  
Harbin 150001, P. R. China.*

*<sup>b</sup> CAS Key Laboratory of Functional Materials and Devices for Special Environments,  
Xinjiang Key Laboratory of Electronic Information Materials and Devices, Xinjiang  
Technical Institute of Physics & Chemistry of CAS, 40-1 South Beijing Road, Urumqi  
830011, China.*

\*Corresponding Author: Phone: +(86)-991-3838957. Fax: +(86)-991-3674558.

E-mail: wuxiaohong@hit.edu.cn, slpan@ms.xjb.ac.cn

**Table S1.** Atomic coordinates ( $\times 10^4$ ) and equivalent isotropic displacement parameters ( $\text{\AA}^2 \times 10^3$ ) for  $\text{K}_2\text{TeP}_2\text{O}_8$ .  $U_{\text{eq}}$  is defined as one-third of the trace of the orthogonalized  $U_{ij}$  tensor.

| Atom  | x        | y        | z        | U(eq) |
|-------|----------|----------|----------|-------|
| K(1)  | 9850(2)  | 8262(2)  | -72(4)   | 24(1) |
| K(2)  | 8227(2)  | 5006(2)  | -10(4)   | 32(1) |
| Te(1) | 7342(1)  | 7520(1)  | 4630(1)  | 18(1) |
| P(1)  | 9939(2)  | 6209(2)  | 4894(4)  | 14(1) |
| P(2)  | 6238(2)  | 5112(2)  | 4926(4)  | 25(1) |
| O(1)  | 7875(6)  | 7782(6)  | 1681(11) | 29(2) |
| O(2)  | 10150(6) | 6267(5)  | 2272(12) | 24(1) |
| O(3)  | 6656(7)  | 6078(6)  | 3365(14) | 37(2) |
| O(4)  | 6256(6)  | 5342(6)  | 7553(12) | 28(2) |
| O(5)  | 8819(8)  | 6577(9)  | 5823(19) | 63(3) |
| O(6)  | 8178(12) | 9121(7)  | 6032(16) | 77(4) |
| O(7)  | 5809(8)  | 8240(10) | 3537(17) | 68(3) |
| O(8)  | 5000     | 5000     | 3920(20) | 81(6) |
| O(9)  | 10341(9) | 5023(10) | 5860(20) | 16(3) |

**Table S2.** Selected bond distances (Å) and angles (deg) for K<sub>2</sub>TeP<sub>2</sub>O<sub>8</sub>.

|                    |           |                    |            |
|--------------------|-----------|--------------------|------------|
| K(1)-O(1)          | 2.621(7)  | O(4)#3-K(2)-O(2)#6 | 154.6(2)   |
| K(1)-O(4)#1        | 2.769(7)  | O(4)#3-K(2)-O(9)#7 | 97.2(3)    |
| K(1)-O(2)          | 2.779(6)  | O(2)#6-K(2)-O(9)#7 | 86.4(3)    |
| K(1)-O(7)#2        | 2.888(11) | O(4)#3-K(2)-O(3)   | 72.4(2)    |
| K(1)-O(3)#2        | 2.939(9)  | O(2)#6-K(2)-O(3)   | 113.8(2)   |
| K(1)-O(8)#2        | 3.008(9)  | O(9)#7-K(2)-O(3)   | 153.2(3)   |
| K(1)-O(6)#3        | 3.120(13) | O(4)#3-K(2)-O(6)#8 | 86.1(3)    |
| K(1)-O(4)#4        | 3.180(7)  | O(2)#6-K(2)-O(6)#8 | 81.8(3)    |
| K(1)-O(5)#3        | 3.299(12) | O(9)#7-K(2)-O(6)#8 | 158.0(3)   |
| K(1)-P(2)#2        | 3.727(3)  | O(3)-K(2)-O(6)#8   | 48.1(2)    |
| K(1)-P(2)#5        | 3.738(3)  | O(4)#3-K(2)-O(2)   | 141.1(2)   |
| K(1)-P(1)#3        | 3.744(3)  | O(2)#6-K(2)-O(2)   | 64.3(2)    |
| K(2)-O(4)#3        | 2.748(7)  | O(9)#7-K(2)-O(2)   | 83.3(3)    |
| K(2)-O(2)#6        | 2.787(7)  | O(3)-K(2)-O(2)     | 89.8(2)    |
| K(2)-O(9)#7        | 2.854(12) | O(6)#8-K(2)-O(2)   | 107.7(3)   |
| K(2)-O(3)          | 2.954(9)  | O(4)#3-K(2)-O(5)#3 | 74.8(2)    |
| K(2)-O(6)#8        | 2.971(12) | O(2)#6-K(2)-O(5)#3 | 121.6(2)   |
| K(2)-O(2)          | 3.042(7)  | O(9)#7-K(2)-O(5)#3 | 43.2(3)    |
| K(2)-O(5)#3        | 3.078(10) | O(3)-K(2)-O(5)#3   | 110.1(2)   |
| K(2)-O(7)#9        | 3.125(13) | O(6)#8-K(2)-O(5)#3 | 155.5(3)   |
| K(2)-O(1)#9        | 3.152(7)  | O(2)-K(2)-O(5)#3   | 79.7(2)    |
| K(2)-O(9)#3        | 3.407(11) | O(4)#3-K(2)-O(7)#9 | 96.5(2)    |
| Te(1)-O(1)         | 1.779(6)  | O(2)#6-K(2)-O(7)#9 | 69.0(2)    |
| Te(1)-O(3)         | 2.062(7)  | O(9)#7-K(2)-O(7)#9 | 43.2(3)    |
| Te(1)-O(7)         | 2.121(8)  | O(3)-K(2)-O(7)#9   | 159.1(2)   |
| Te(1)-O(5)         | 2.210(9)  | O(6)#8-K(2)-O(7)#9 | 114.9(2)   |
| Te(1)-O(6)         | 2.325(8)  | O(2)-K(2)-O(7)#9   | 109.1(2)   |
| P(1)-O(2)          | 1.473(7)  | O(5)#3-K(2)-O(7)#9 | 82.9(3)    |
| P(1)-O(5)          | 1.504(9)  | O(4)#3-K(2)-O(1)#9 | 67.98(19)  |
| P(1)-O(7)#1        | 1.512(9)  | O(2)#6-K(2)-O(1)#9 | 86.90(19)  |
| P(1)-O(9)          | 1.615(12) | O(9)#7-K(2)-O(1)#9 | 90.4(3)    |
| P(1)-O(9)#6        | 1.630(12) | O(3)-K(2)-O(1)#9   | 107.41(19) |
| P(2)-O(4)          | 1.479(7)  | O(6)#8-K(2)-O(1)#9 | 70.6(2)    |
| P(2)-O(6)#8        | 1.493(9)  | O(2)-K(2)-O(1)#9   | 150.77(19) |
| P(2)-O(3)          | 1.543(7)  | O(5)#3-K(2)-O(1)#9 | 114.3(3)   |
| P(2)-O(8)          | 1.588(5)  | O(7)#9-K(2)-O(1)#9 | 51.65(19)  |
| O(1)-K(1)-O(4)#1   | 119.9(2)  | O(4)#3-K(2)-O(9)#3 | 108.0(2)   |
| O(1)-K(1)-O(2)     | 75.5(2)   | O(2)#6-K(2)-O(9)#3 | 77.8(2)    |
| O(4)#1-K(1)-O(2)   | 103.0(2)  | O(9)#7-K(2)-O(9)#3 | 11.1(3)    |
| O(1)-K(1)-O(7)#2   | 117.6(2)  | O(3)-K(2)-O(9)#3   | 153.2(3)   |
| O(4)#1-K(1)-O(7)#2 | 118.8(2)  | O(6)#8-K(2)-O(9)#3 | 156.7(3)   |
| O(2)-K(1)-O(7)#2   | 72.7(3)   | O(2)-K(2)-O(9)#3   | 73.3(2)    |

|                    |            |                    |          |
|--------------------|------------|--------------------|----------|
| O(1)-K(1)-O(3)#2   | 162.5(2)   | O(5)#3-K(2)-O(9)#3 | 47.5(3)  |
| O(4)#1-K(1)-O(3)#2 | 72.3(2)    | O(7)#9-K(2)-O(9)#3 | 46.6(3)  |
| O(2)-K(1)-O(3)#2   | 115.7(2)   | O(1)#9-K(2)-O(9)#3 | 96.9(2)  |
| O(7)#2-K(1)-O(3)#2 | 58.0(2)    | O(1)-Te(1)-O(3)    | 89.1(3)  |
| O(1)-K(1)-O(8)#2   | 118.22(16) | O(1)-Te(1)-O(7)    | 88.6(4)  |
| O(4)#1-K(1)-O(8)#2 | 83.5(2)    | O(3)-Te(1)-O(7)    | 84.9(4)  |
| O(2)-K(1)-O(8)#2   | 159.8(2)   | O(1)-Te(1)-O(5)    | 94.6(3)  |
| O(7)#2-K(1)-O(8)#2 | 87.3(3)    | O(3)-Te(1)-O(5)    | 88.6(4)  |
| O(3)#2-K(1)-O(8)#2 | 47.54(15)  | O(7)-Te(1)-O(5)    | 172.8(5) |
| O(1)-K(1)-O(6)#3   | 75.6(3)    | O(1)-Te(1)-O(6)    | 90.0(3)  |
| O(4)#1-K(1)-O(6)#3 | 122.1(2)   | O(3)-Te(1)-O(6)    | 178.0(4) |
| O(2)-K(1)-O(6)#3   | 134.3(2)   | O(7)-Te(1)-O(6)    | 96.9(5)  |
| O(7)#2-K(1)-O(6)#3 | 90.6(3)    | O(5)-Te(1)-O(6)    | 89.6(5)  |
| O(3)#2-K(1)-O(6)#3 | 87.3(3)    | O(2)-P(1)-O(5)     | 118.4(5) |
| O(8)#2-K(1)-O(6)#3 | 46.7(2)    | O(2)-P(1)-O(7)#1   | 115.1(4) |
| O(1)-K(1)-O(4)#4   | 68.9(2)    | O(5)-P(1)-O(7)#1   | 106.6(6) |
| O(4)#1-K(1)-O(4)#4 | 62.8(3)    | O(2)-P(1)-O(9)     | 108.5(5) |
| O(2)-K(1)-O(4)#4   | 123.16(19) | O(5)-P(1)-O(9)     | 114.8(6) |
| O(7)#2-K(1)-O(4)#4 | 164.0(3)   | O(7)#1-P(1)-O(9)   | 90.1(6)  |
| O(3)#2-K(1)-O(4)#4 | 111.05(19) | O(2)-P(1)-O(9)#6   | 113.8(5) |
| O(8)#2-K(1)-O(4)#4 | 76.9(2)    | O(5)-P(1)-O(9)#6   | 88.8(6)  |
| O(6)#3-K(1)-O(4)#4 | 76.6(2)    | O(7)#1-P(1)-O(9)#6 | 111.2(6) |
| O(1)-K(1)-O(5)#3   | 77.2(2)    | O(9)-P(1)-O(9)#6   | 29.2(7)  |
| O(4)#1-K(1)-O(5)#3 | 162.8(2)   | O(4)-P(2)-O(6)#8   | 119.7(5) |
| O(2)-K(1)-O(5)#3   | 79.9(2)    | O(4)-P(2)-O(3)     | 113.6(4) |
| O(7)#2-K(1)-O(5)#3 | 45.4(2)    | O(6)#8-P(2)-O(3)   | 105.5(5) |
| O(3)#2-K(1)-O(5)#3 | 91.1(2)    | O(4)-P(2)-O(8)     | 111.9(5) |
| O(8)#2-K(1)-O(5)#3 | 88.5(2)    | O(6)#8-P(2)-O(8)   | 104.1(6) |
| O(6)#3-K(1)-O(5)#3 | 59.6(2)    | O(3)-P(2)-O(8)     | 100.0(5) |
| O(4)#4-K(1)-O(5)#3 | 129.9(2)   |                    |          |

#1  $x+1/2, -y+3/2, -z+1$       #2  $x+1/2, -y+3/2, -z$   
 #3  $x, y, z-1$     #4  $-x+3/2, y+1/2, -z+1$     #5  $-x+3/2, y+1/2, -z$   
 #6  $-x+2, -y+1, z$     #7  $-x+2, -y+1, z-1$     #8  $-x+3/2, y-1/2, -z+1$   
           #9  $-x+3/2, y-1/2, -z$                     #10  $x-1/2, -y+3/2, -z$   
 #11  $x, y, z+1$     #12  $-x+2, -y+1, z+1$     #13  $x-1/2, -y+3/2, -z+1$   
 #14  $-x+1, -y+1, z$

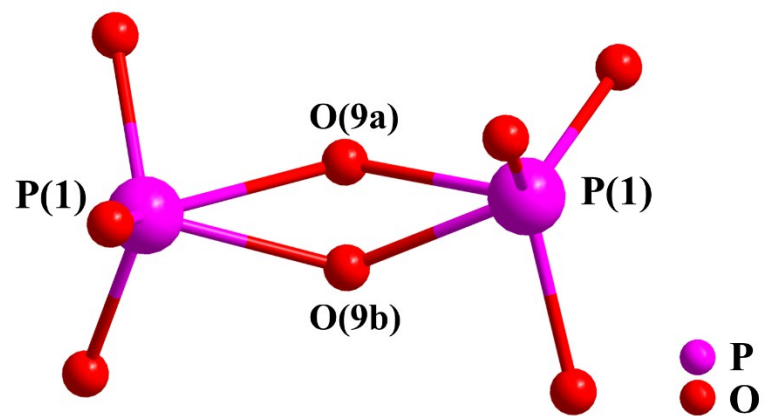

**Fig. S1** The split of O(9) atom in  $K_2TeP_2O_8$

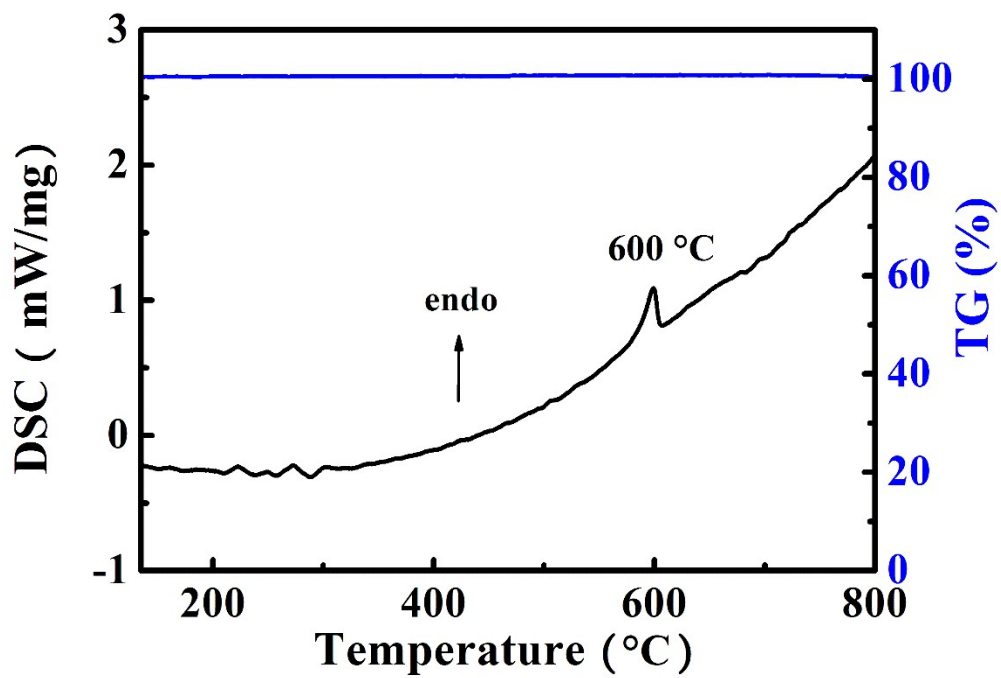

Fig. S2. TG-DSC curves of  $K_2TeP_2O_8$ .

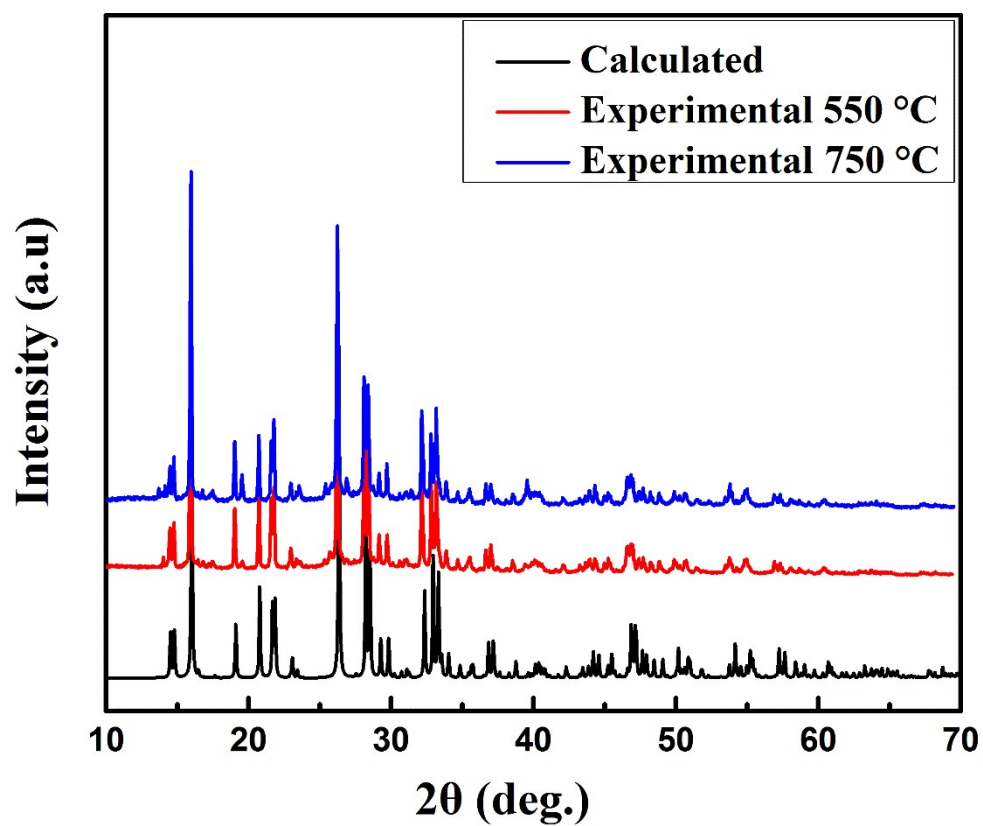

Fig. S3. Experimental and calculated XRD patterns of  $\text{K}_2\text{TeP}_2\text{O}_8$ .

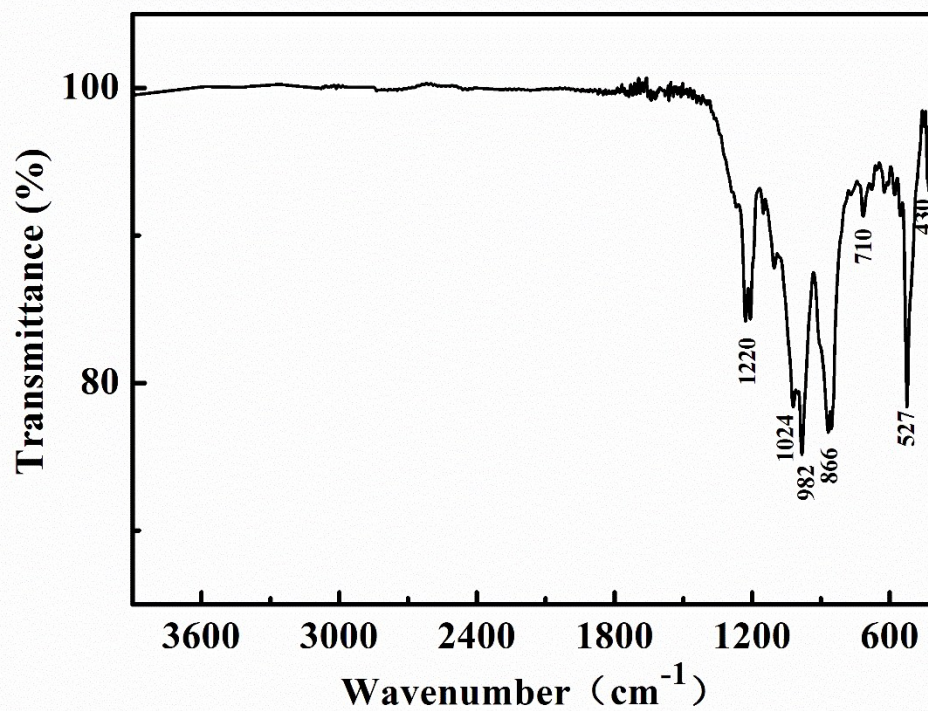

Fig. S4. IR spectrum of  $K_2TeP_2O_8$ .



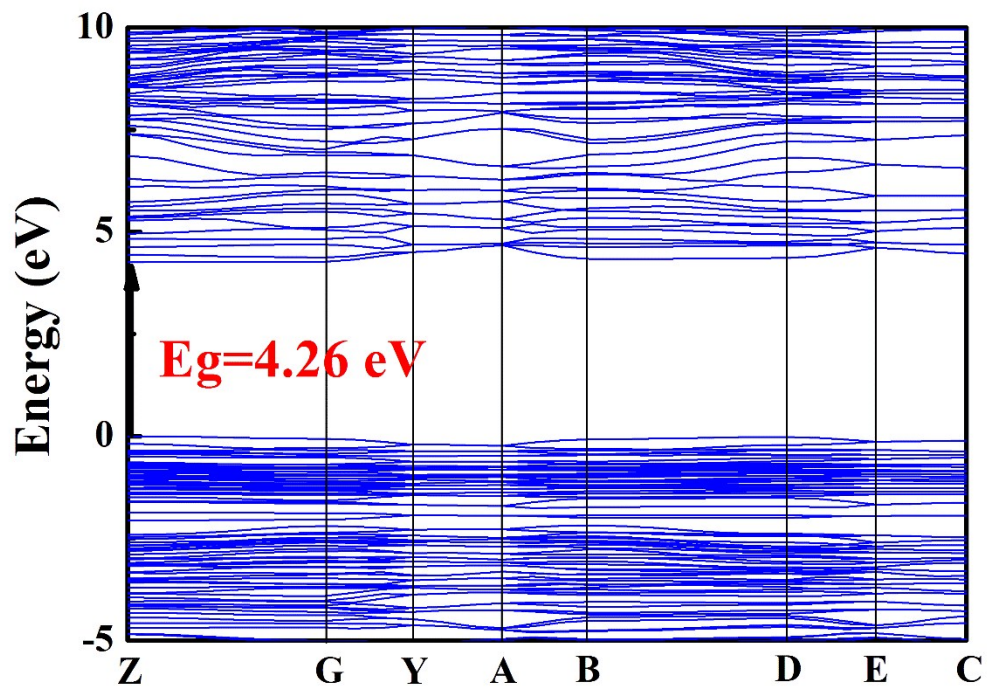

**Fig. S5.** Band structure of  $K_2TeP_2O_8$ .

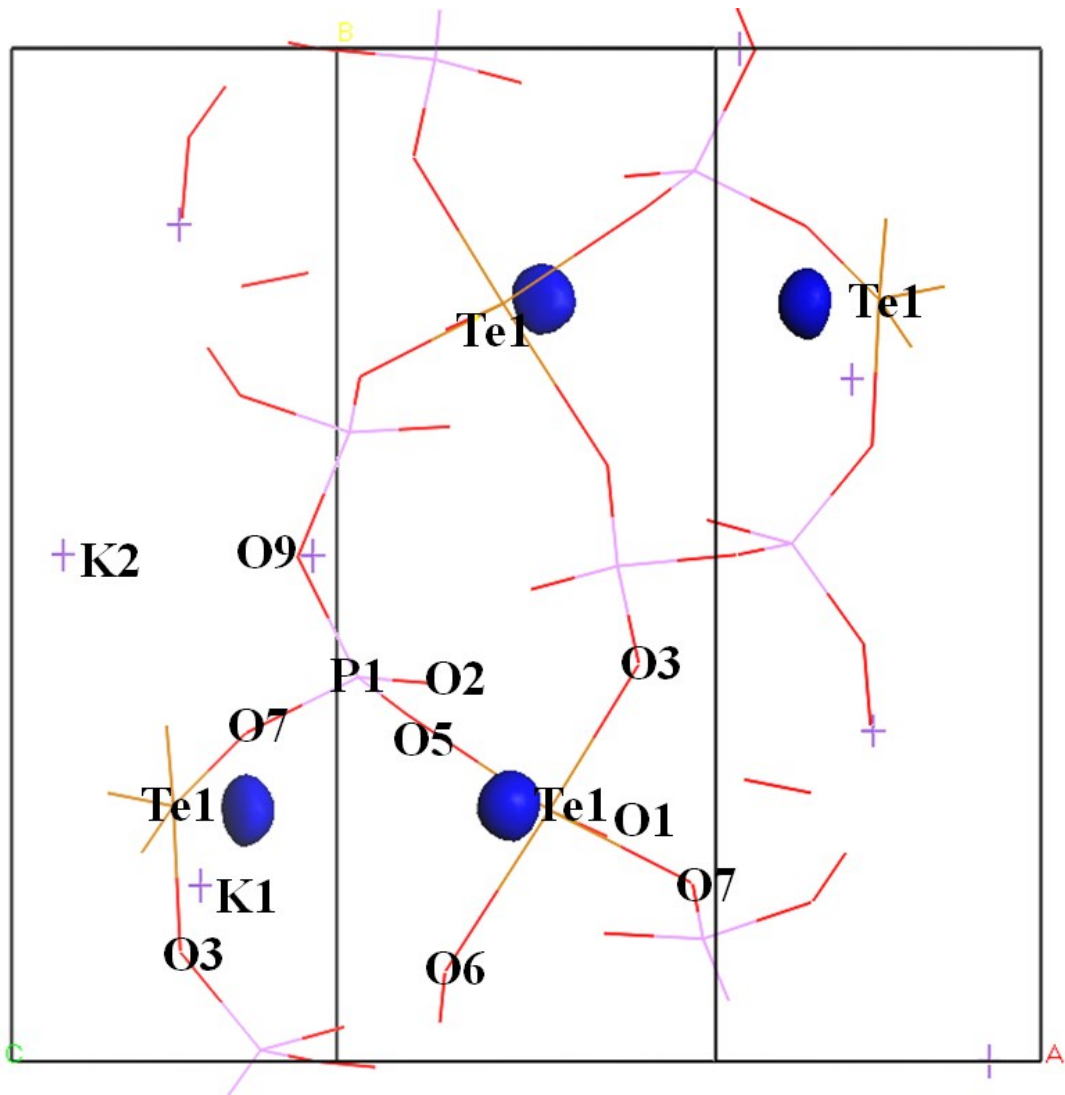

Fig. S6. The electronic local function of  $\text{K}_2\text{TeP}_2\text{O}_8$ .
